# Supplementary material
Source: HighWire-hosted journal article supplement (https://jnm.snmjournals.org/highwire/filestream/101959/field_highwire_adjunct_files/0/250803_Supplemental_Data.pdf)
Supplement: 250803_Supplemental_Data.pdf [file 250803_Supplemental_Data.pdf]

**Supplemental Fig. 1**

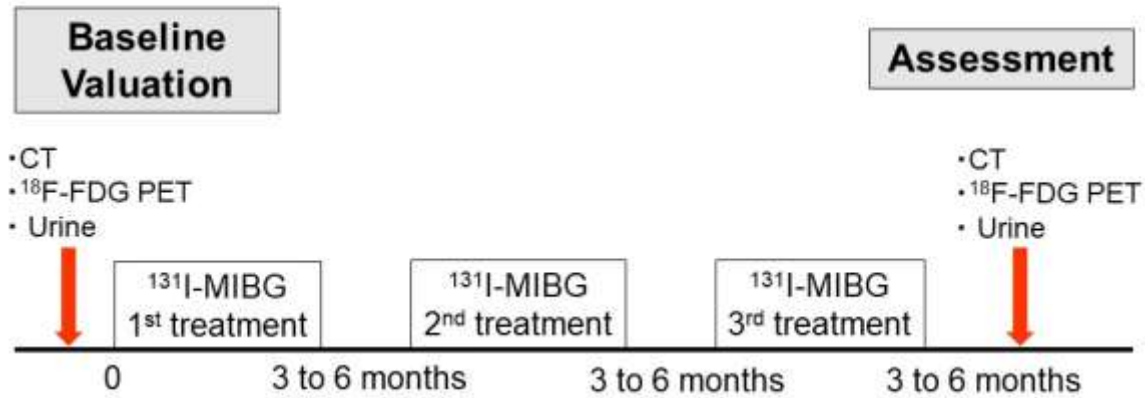

<sup>131</sup>I-MIBG radiotherapy protocol

CT= computed tomography, FDG= fluorodeoxyglucose, MIBG= meta-iodobenzylguanidine

**Supplemental Fig. 2**

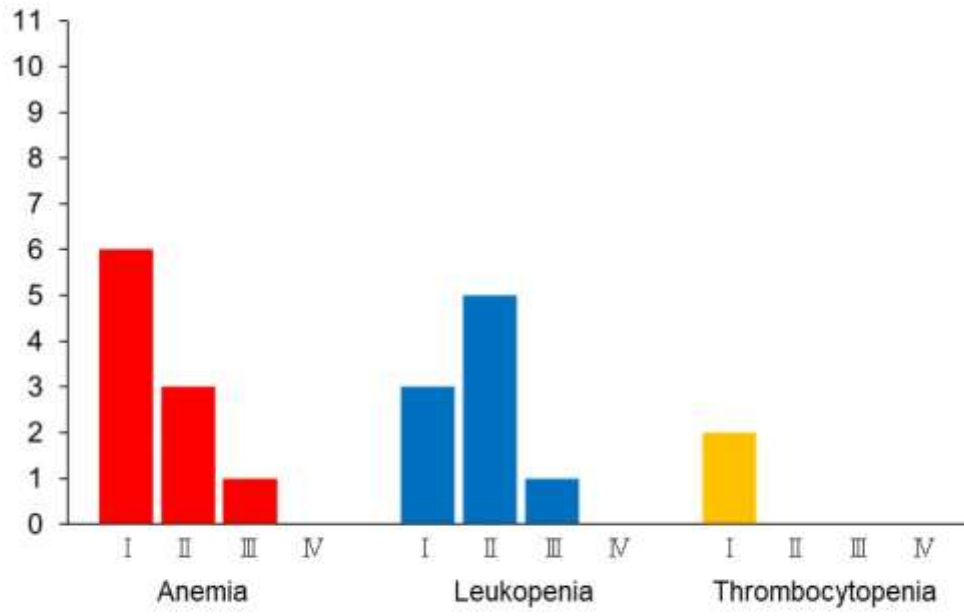

Details of bone marrow suppression after  $^{131}\text{I}$ -MIBG radiotherapy based on CTCAE v3.0

**Supplemental Table 1**All Patients ( $n = 11$ )

|                                             | Before              | After              | <i>P</i> |
|---------------------------------------------|---------------------|--------------------|----------|
|                                             | Median (IQR)        | Median (IQR)       |          |
| <b>Hemodynamic</b>                          |                     |                    |          |
| Sys BP (mmHg)                               | 116 (106-153)       | 115 (103-124)      | 0.206    |
| Dia BP (mmHg)                               | 78 (67-92)          | 70 (68-81)         | 0.375    |
| HR (beats/min)                              | 72 (60-88)          | 80 (70-88)         | 0.364    |
| <b>Image parameters</b>                     |                     |                    |          |
| SLD by CT (mm)                              | 228.7 (37.0-336.0)  | 171.0 (38.0-270.0) | 0.563    |
| Number of regions                           | 12 (3-19)           | 12 (3-19)          | 0.625    |
| <sup>18</sup> F-FDG score (0 to 5)          | 4.4 (3.1-4.7)       | 4.2 (2.3-4.8)      | 0.688    |
| <sup>18</sup> F-FDG mean SUV <sub>max</sub> | 3.8 (1.3-9.0)       | 3.3 (2.0-7.4)      | 0.922    |
| <b>Thyroid function</b>                     |                     |                    |          |
| TSH (μIU/ml) <sup>a</sup>                   | 1.4 (0.6-2.4)       | 1.1 (0.6-1.8)      | 0.359    |
| FT3 (pg/ml) <sup>a</sup>                    | 2.6 (2.4-2.8)       | 2.3 (2.0-2.8)      | 0.055    |
| FT4 (ng/dl) <sup>a</sup>                    | 1.2 (1.1-1.3)       | 1.2 (1.1-1.3)      | 0.238    |
| <b>Catecholamine</b>                        |                     |                    |          |
| Ad (pg/ml)                                  | 11 (5-18)           | 16 (10-22)         | 0.651    |
| NE (pg/ml)                                  | 719 (199-5997)      | 743 (399-1809)     | 0.577    |
| Uad (μg/day) <sup>a</sup>                   | 3.6 (3.2-10.6)      | 4.1 (2.4-10.2)     | 0.910    |
| Une (μg/day) <sup>a</sup>                   | 179.0 (101.2-810.8) | 294.1 (97.7-565.1) | 0.734    |
| VMA (mg/day) <sup>a</sup>                   | 6.9 (3.9-17.1)      | 7.2 (4.0-12.3)     | 0.203    |
| HVA (mg/day) <sup>b</sup>                   | 4.1 (3.0-4.9)       | 3.4 (3.0-4.3)      | 0.547    |
| <b>Complete blood counts</b>                |                     |                    |          |
| WBC (/μl)                                   | 4200 (3700-5700)    | 2600 (2100-3200)   | 0.012*   |
| Seg (/μl)                                   | 2406 (2075-3947)    | 1665 (1430-2050)   | 0.042*   |
| Hb (g/dl)                                   | 12.0 (10.9-13.4)    | 11.7 (9.5-12.5)    | 0.035*   |
| PLT (×10 <sup>4</sup> /μl)                  | 25.9 (18.5-32.3)    | 15.2 (13.3-18.9)   | 0.001*   |

<sup>a</sup> $n = 9$ , <sup>b</sup> $n = 10$ \* $P < 0.05$ 

Data are described as median (interquartile range)

Ad: Adrenaline

BP: Blood pressure

CT: Computed tomography

FDG: Fluorodeoxyglucose

FT3: Free T3

FT4: Free T4

HR: Heart rate

NE: Norepinephrine

SLD: summed length diameter

TSH: Thyroid stimulating hormone

Uad: Urine adrenaline

Une: Urine norepinephrine

VMA: Vanillylmandelic acid

**Supplemental Table 2**Patients with PR or StaD ( $n = 9$ )

|                                             | Before                 | After                  | <i>P</i> |
|---------------------------------------------|------------------------|------------------------|----------|
|                                             | Median (IQR)           | Median (IQR)           |          |
| <b>Hemodynamic</b>                          |                        |                        |          |
| Sys BP (mmHg)                               | 116.0 (109.5-142.5)    | 115.0 (102.0-123.5)    | 0.164    |
| Dia BP (mmHg)                               | 80.0 (67.5-94.0)       | 70.0 (67.5-81.5)       | 0.250    |
| HR (beats/min)                              | 72.0 (63.0-92.0)       | 77.0 (68.5-83.0)       | 1.000    |
| <b>Image parameters</b>                     |                        |                        |          |
| SLD by CT (mm)                              | 81.0 (27.0-278.0)      | 64.0 (26.0-216.0)      | 0.039*   |
| Number of regions                           | 5 (2-17)               | 4 (2-16)               | 0.500    |
| <sup>18</sup> F-FDG score (0 to 5)          | 4.7 (3.4-4.9)          | 4.0 (2.3-4.9)          | 0.250    |
| <sup>18</sup> F-FDG mean SUV <sub>max</sub> | 3.4 (1.2-6.8)          | 2.3 (1.5-5.4)          | 0.312    |
| <b>Thyroid function</b>                     |                        |                        |          |
| TSH (μIU/ml) <sup>a</sup>                   | 1.8 (0.4-2.5)          | 1.2 (0.7-2.5)          | 1.000    |
| FT3 (pg/ml) <sup>a</sup>                    | 2.6 (2.5-3.0)          | 2.7 (2.2-2.8)          | 0.406    |
| FT4 (ng/dl) <sup>a</sup>                    | 1.1 (1.1-1.2)          | 1.2 (1.1-1.3)          | 0.156    |
| <b>Catecholamine</b>                        |                        |                        |          |
| Ad (pg/ml) <sup>b</sup>                     | 12.0 (5.3-22.8)        | 14.0 (8.5-20.0)        | 0.867    |
| NE (pg/ml) <sup>b</sup>                     | 1633.0 (292.5-5738.0)  | 717.0 (448.5-1549.0)   | 0.109    |
| Uad (μg/day) <sup>c</sup>                   | 3.4 (3.2-14.3)         | 2.7 (2.1-4.8)          | 0.219    |
| Une (μg/day) <sup>c</sup>                   | 224.3 (116.2-930.0)    | 294.1 (88.5-451.0)     | 0.219    |
| VMA (mg/day) <sup>c</sup>                   | 9.5 (4.7-23.6)         | 7.2 (3.8-9.8)          | 0.031*   |
| HVA (mg/day) <sup>c</sup>                   | 4.4 (3.7-5.1)          | 3.4 (2.7-4.0)          | 0.094    |
| <b>Complete blood counts</b>                |                        |                        |          |
| WBC (/μl)                                   | 4200 (3300-5650)       | 2600 (2000-3100)       | 0.004*   |
| Seg (/μl)                                   | 2406.0 (1905.5-3768.5) | 1512.0 (1361.0-1878.0) | 0.012*   |
| Hb (g/dl)                                   | 12.4 (11.2-13.9)       | 11.9 (10.3-12.6)       | 0.266    |
| PLT (×10 <sup>4</sup> /μl)                  | 30.4 (19.5-33.6)       | 16.9 (14.2-20.7)       | 0.004*   |

<sup>a</sup> $n = 6$ , <sup>b</sup> $n = 8$ , <sup>c</sup> $n = 7$ \* $P < 0.05$

**Supplemental Table 3**

## Evaluation of response by RECIST

| Pt No. | Location of lesions                     | Sum of the longest diameter (mm) |          | Reduction rate (%) | New lesions After TX               | Response by RECIST |
|--------|-----------------------------------------|----------------------------------|----------|--------------------|------------------------------------|--------------------|
|        |                                         | Before Tx                        | After Tx |                    |                                    |                    |
| 1      | Lung, Liver                             | 279                              | 171      | 39                 | None                               | PR                 |
| 2      | Pelvis                                  | 37                               | 38       | -3                 | None                               | St <u>a</u> D      |
| 3      | Liver, Bone                             | 49                               | 46       | 6                  | None                               | St <u>a</u> D      |
| 4      | Bone                                    | 17                               | 11       | 35                 | None                               | PR                 |
| 5      | Lung, Liver, Abdominal lymph node, Bone | 388                              | 198      | 49                 | None                               | PR                 |
| 6      | Abdominal lymph node, Bone              | 229                              | 234      | -2                 | None                               | St <u>a</u> D      |
| 7      | Liver, Bone                             | 446                              | 744      | -67                | Liver, Bone                        | PD                 |
| 8      | Lung, Abdomen, Bone                     | 213                              | 795      | -134               | Lung, Abdomen, Liver, Bone, Others | PD                 |
| 9      | Abdominal lymph node, Bone              | 277                              | 270      | 3                  | None                               | St <u>a</u> D      |
| 10     | Liver, Bone                             | 81                               | 64       | 21                 | None                               | St <u>a</u> D      |
| 11     | Peritoneum                              | 17                               | 14       | 18                 | None                               | St <u>a</u> D      |

### **Supplemental Table 4**

#### Lesion-Based Analysis Related to Treatment Response Segment

|                                                                   | Before           | After            | <i>P</i> |
|-------------------------------------------------------------------|------------------|------------------|----------|
|                                                                   | Median (IQR)     | Median (IQR)     |          |
| <b>(A) Per-site (all patients) (<i>n</i> = 134 segments)</b>      |                  |                  |          |
| Tumor size by CT (mm)                                             | 15.0 (10.0-22.0) | 15.0 (10.0-23.0) | 0.984    |
| FDG score (1 to 5)                                                | 5.0 (4.0-5.0)    | 5 (3.0-5.0)      | 0.225    |
| Mean SUV <sub>max</sub>                                           | 4.1 (1.9-8.3)    | 4.3 (2.8-9.2)    | 0.243    |
| <b>(B) Per-site (patients with StaD) (<i>n</i> = 79 segments)</b> |                  |                  |          |
| Tumor size by CT (mm)                                             | 16.0 (12.0-22.0) | 11.0 (6.0-16.0)  | < 0.001  |
| FDG score (1 to 5)                                                | 5.0 (3.0-5.0)    | 4.0 (1.0-5.0)    | < 0.001  |
| Mean SUV <sub>max</sub>                                           | 4.0 (2.6-5.4)    | 3.2 (1.0-4.3)    | < 0.001  |
